# Supplementary material for: Defect patterns on the curved surface of fish retinae suggest a mechanism of cone mosaic formation
Source: PubMed Central journal article supplement (PMC7771878; doi:10.1371/journal.pcbi.1008437), 2020-12-15

S6 Fig

**A**

Immediately After Photoconversion

Two Days After Photoconversion

two days of growth  
(new photoreceptors)

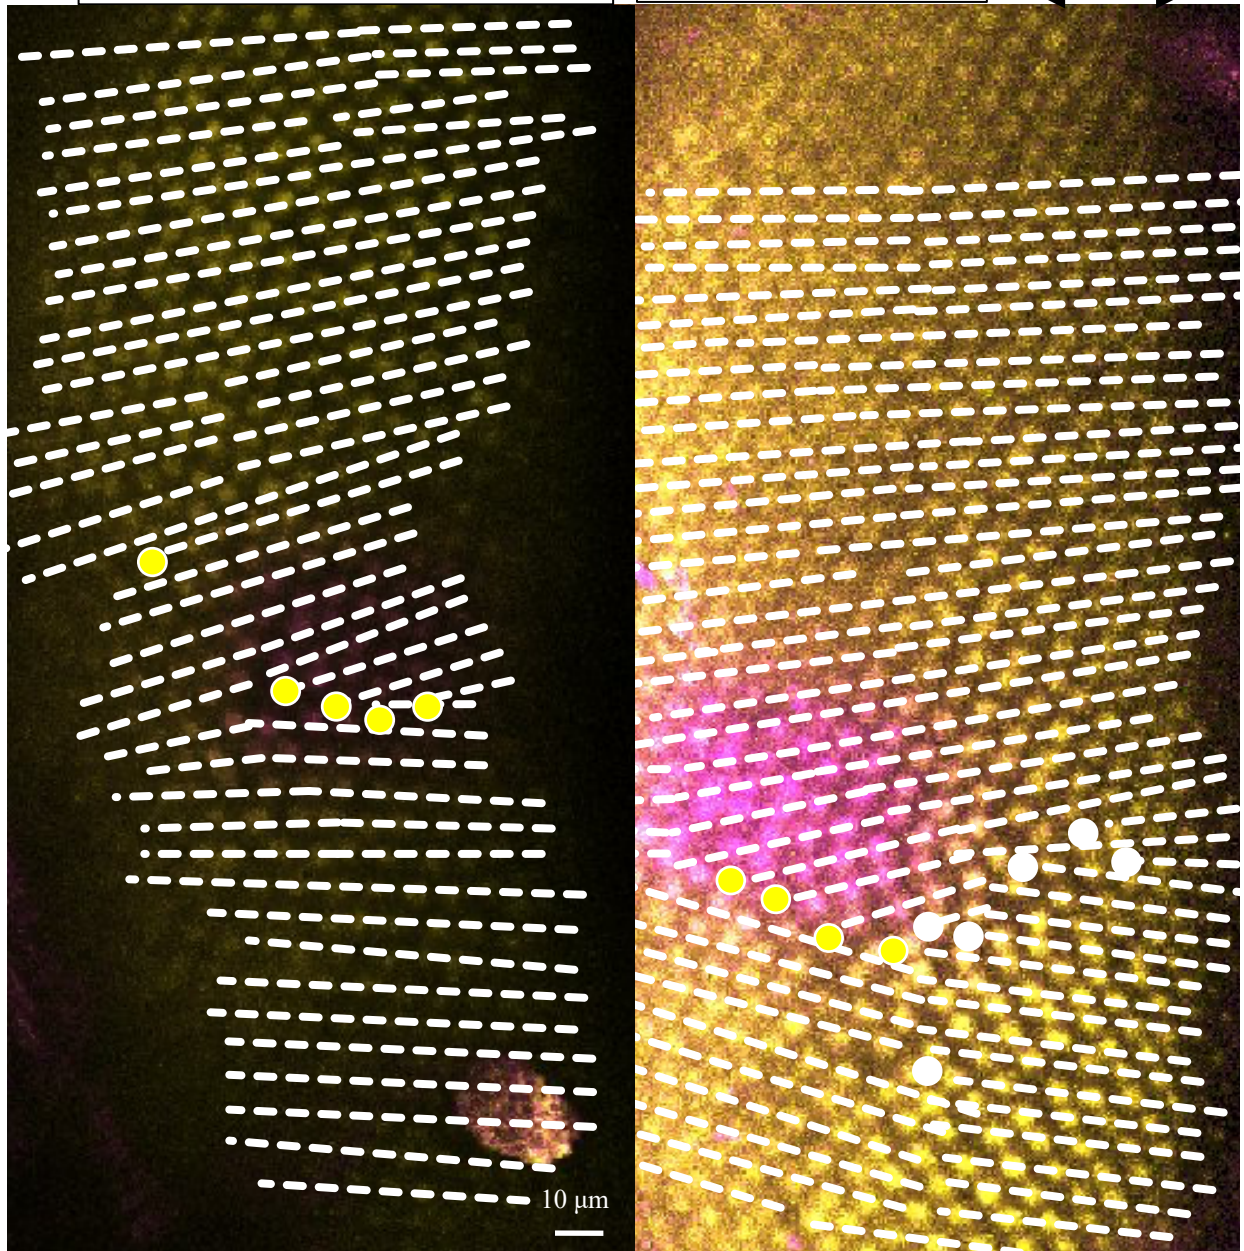

S6 Fig (Continued).

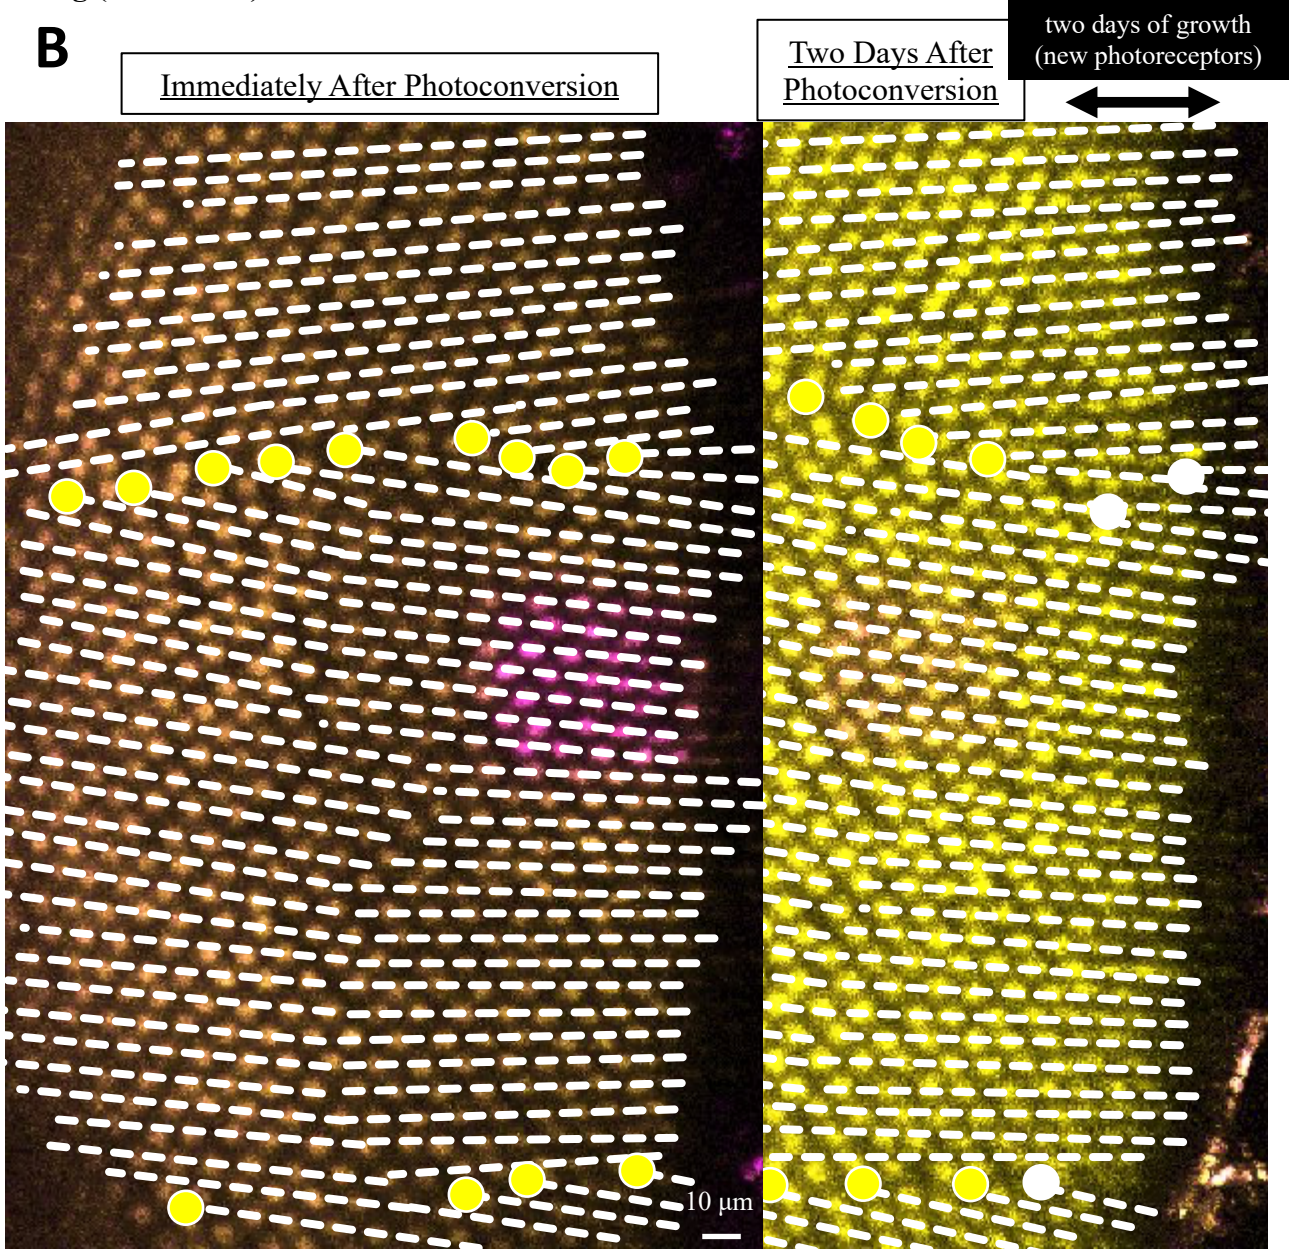

Supplement: pcbi.1008437.s006.pdf [file pcbi.1008437.s006.pdf]
