# Supplementary material for: Defect patterns on the curved surface of fish retinae suggest a mechanism of cone mosaic formation
Source: PubMed Central journal article supplement (PMC7771878; doi:10.1371/journal.pcbi.1008437), 2020-12-15

S11 Fig

**A**

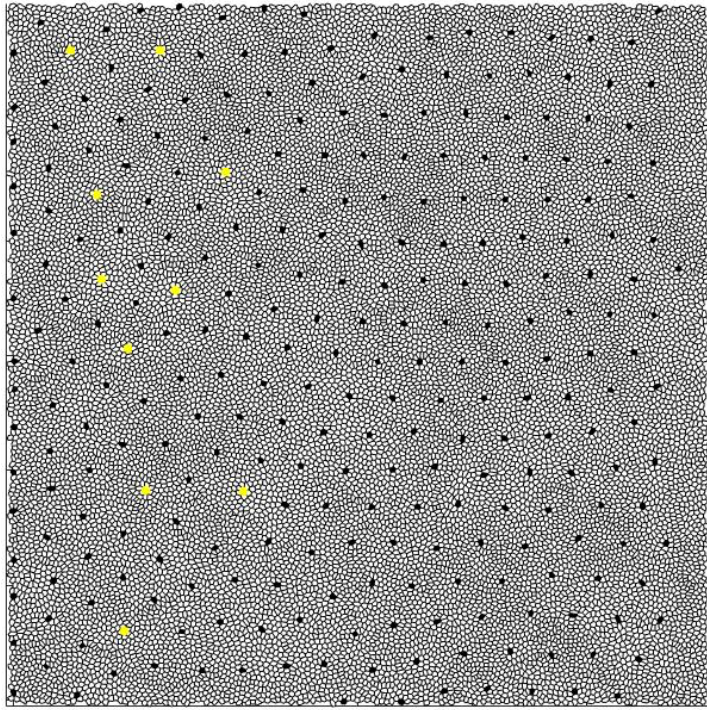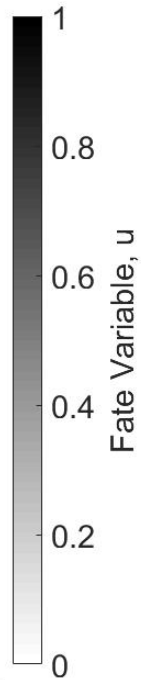

**B**

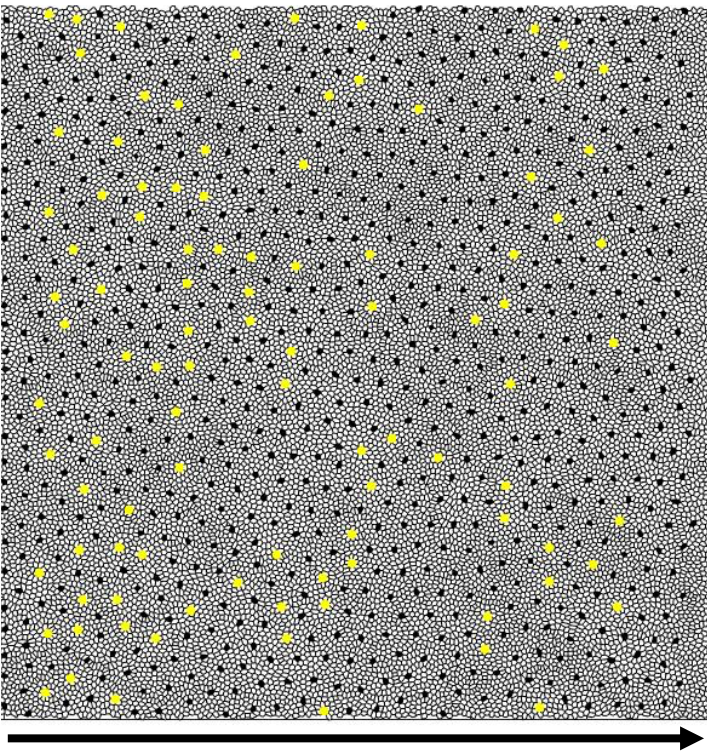

S11 Fig (Continued).

**C**

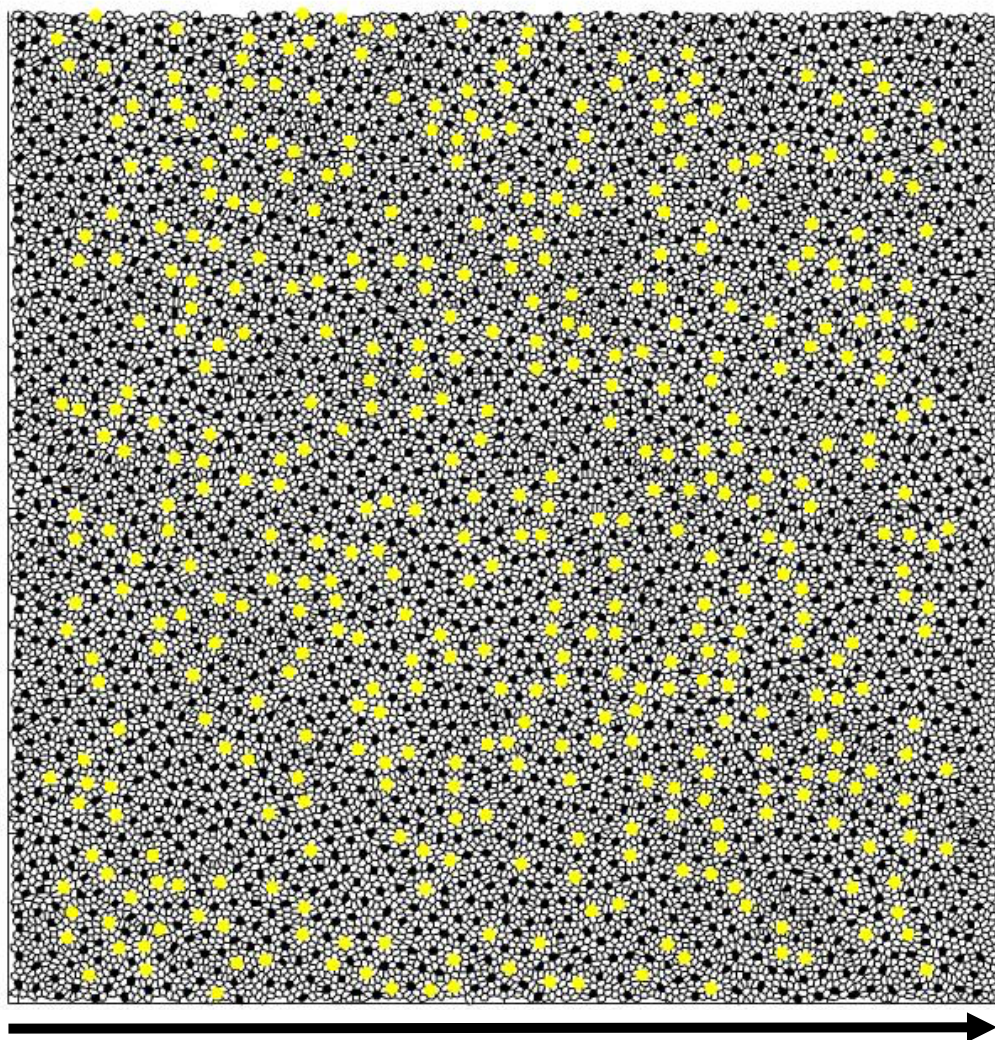

Supplement: pcbi.1008437.s011.pdf [file pcbi.1008437.s011.pdf]
