# Supplementary material for: Defect patterns on the curved surface of fish retinae suggest a mechanism of cone mosaic formation
Source: PubMed Central journal article supplement (PMC7771878; doi:10.1371/journal.pcbi.1008437), 2020-12-15
Supplement: pcbi.1008437.s013.pdf [file pcbi.1008437.s013.pdf]

| <b>Fish #</b> | <b>Number of (forward) Y-Junctions</b> | <b>Number of (reverse) Y-Junctions</b> |
|---------------|----------------------------------------|----------------------------------------|
| 1             | 155                                    | 0                                      |
| 2             | 166                                    | 5                                      |
| 3             | 221                                    | 0                                      |
| 4             | 275                                    | 5                                      |
| 5             | 249                                    | 14                                     |
| 6             | 184                                    | 2                                      |
| 7             | 182                                    | 10*                                    |
| 8             | 285                                    | 7                                      |
