# Supplementary material for: Defect patterns on the curved surface of fish retinae suggest a mechanism of cone mosaic formation
Source: PubMed Central journal article supplement (PMC7771878; doi:10.1371/journal.pcbi.1008437), 2020-12-15
Supplement: pcbi.1008437.s014.pdf [file pcbi.1008437.s014.pdf]

|                        |                 | Box Dimension                                 |               |                     |                                                |               |                     |                                                |                 |                     |     |     |
|------------------------|-----------------|-----------------------------------------------|---------------|---------------------|------------------------------------------------|---------------|---------------------|------------------------------------------------|-----------------|---------------------|-----|-----|
|                        |                 | 88 pixels=19.6 $\mu\text{m}$ $\approx$ 3 rows |               |                     | 118 pixels=26.3 $\mu\text{m}$ $\approx$ 4 rows |               |                     | 147 pixels=32.7 $\mu\text{m}$ $\approx$ 5 rows |                 |                     |     |     |
| Domain Rotation Cutoff | 10.0°           | Fish #                                        | # Y-Junctions | # Y-Junctions in GB | Fish #                                         | # Y-Junctions | # Y-Junctions in GB | Fish #                                         | # Y-Junctions   | # Y-Junctions in GB |     |     |
|                        |                 | 1                                             | 155           | 144                 | 1                                              | 155           | 141                 | 1                                              | 155             | 140                 |     |     |
|                        |                 | 2                                             | 166           | 151                 | 2                                              | 166           | 144                 | 2                                              | 166             | 146                 |     |     |
|                        |                 | 3                                             | 221           | 209                 | 3                                              | 221           | 204                 | 3                                              | 221             | 199                 |     |     |
|                        |                 | 4                                             | 275           | 231                 | 4                                              | 275           | 220                 | 4                                              | 275             | 220                 |     |     |
|                        |                 | 5                                             | 249           | 220                 | 5                                              | 249           | 212                 | 5                                              | 249             | 205                 |     |     |
|                        |                 | 6                                             | 184           | 177                 | 6                                              | 184           | 166                 | 6                                              | 184             | 162                 |     |     |
|                        |                 | 7                                             | 182           | 167                 | 7                                              | 182           | 156                 | 7                                              | 182             | 156                 |     |     |
|                        |                 | 8                                             | 285           | 243                 | 8                                              | 285           | 234                 | 8                                              | 285             | 230                 |     |     |
|                        | Average % in GB |                                               |               | 90%                 | Average % in GB                                |               |                     | 86%                                            | Average % in GB |                     |     | 85% |
|                        | 12.0°           | Fish #                                        | # Y-Junctions | # Y-Junctions in GB | Fish #                                         | # Y-Junctions | # Y-Junctions in GB | Fish #                                         | # Y-Junctions   | # Y-Junctions in GB |     |     |
|                        |                 | 1                                             | 155           | 139                 | 1                                              | 155           | 131                 | 1                                              | 155             | 131                 |     |     |
|                        |                 | 2                                             | 166           | 138                 | 2                                              | 166           | 137                 | 2                                              | 166             | 137                 |     |     |
|                        |                 | 3                                             | 221           | 202                 | 3                                              | 221           | 191                 | 3                                              | 221             | 184                 |     |     |
|                        |                 | 4                                             | 275           | 197                 | 4                                              | 275           | 191                 | 4                                              | 275             | 189                 |     |     |
|                        |                 | 5                                             | 249           | 202                 | 5                                              | 249           | 193                 | 5                                              | 249             | 188                 |     |     |
|                        |                 | 6                                             | 184           | 169                 | 6                                              | 184           | 157                 | 6                                              | 184             | 146                 |     |     |
|                        |                 | 7                                             | 182           | 158                 | 7                                              | 182           | 141                 | 7                                              | 182             | 137                 |     |     |
|                        |                 | 8                                             | 285           | 221                 | 8                                              | 285           | 209                 | 8                                              | 285             | 204                 |     |     |
|                        | Average % in GB |                                               |               | 83%                 | Average % in GB                                |               |                     | 79%                                            | Average % in GB |                     |     | 77% |
|                        | 14.0°           | Fish #                                        | # Y-Junctions | # Y-Junctions in GB | Fish #                                         | # Y-Junctions | # Y-Junctions in GB | Fish #                                         | # Y-Junctions   | # Y-Junctions in GB |     |     |
|                        |                 | 1                                             | 155           | 128                 | 1                                              | 155           | 119                 | 1                                              | 155             | 120                 |     |     |
|                        |                 | 2                                             | 166           | 126                 | 2                                              | 166           | 122                 | 2                                              | 166             | 124                 |     |     |
|                        |                 | 3                                             | 221           | 192                 | 3                                              | 221           | 175                 | 3                                              | 221             | 176                 |     |     |
|                        |                 | 4                                             | 275           | 165                 | 4                                              | 275           | 162                 | 4                                              | 275             | 166                 |     |     |
|                        |                 | 5                                             | 249           | 180                 | 5                                              | 249           | 163                 | 5                                              | 249             | 165                 |     |     |
|                        |                 | 6                                             | 184           | 156                 | 6                                              | 184           | 143                 | 6                                              | 184             | 133                 |     |     |
| 7                      |                 | 182                                           | 149           | 7                   | 182                                            | 132           | 7                   | 182                                            | 125             |                     |     |     |
| 8                      |                 | 285                                           | 199           | 8                   | 285                                            | 168           | 8                   | 285                                            | 174             |                     |     |     |
| Average % in GB        |                 |                                               | 75%           | Average % in GB     |                                                |               | 69%                 | Average % in GB                                |                 |                     | 69% |     |

Pixel size is 0.2227074  $\mu\text{m}$  X 0.2227074  $\mu\text{m}$
