# Supplementary material for: Defect patterns on the curved surface of fish retinae suggest a mechanism of cone mosaic formation
Source: PubMed Central journal article supplement (PMC7771878; doi:10.1371/journal.pcbi.1008437), 2020-12-15
Supplement: pcbi.1008437.s015.pdf [file pcbi.1008437.s015.pdf]

| Fish Label | # of Y-Junctions in Photoconverted Region | Days between Photoconversion and Later Imaging | RMSE for Fit Plane at Day 0 ( $\mu m$ ) | RMSE for Fit Plane at Later Imaging ( $\mu m$ ) | Glide Motion of Defect(s) In Units of Rows |
|------------|-------------------------------------------|------------------------------------------------|-----------------------------------------|-------------------------------------------------|--------------------------------------------|
| 1          | 2                                         | 2                                              | 0.85                                    | 0.63                                            | (0, 0)                                     |
| 2          | 1                                         | 2                                              | 0.76                                    | 0.55                                            | 0                                          |
| 3          | 2                                         | 2                                              | 0.50                                    | 0.42                                            | (0, 0)                                     |
| 5          | 1                                         | 2                                              | 0.70                                    | 0.26                                            | 1                                          |
| 6          | 1                                         | 2                                              | 1.0                                     | 0.59                                            | 0                                          |
| 7          | 1                                         | 2                                              | 0.48                                    | 0.63                                            | 1                                          |
| 9          | 1                                         | 2                                              | 0.96                                    | 0.53                                            | 0                                          |
| 10         | 2                                         | 3                                              | 1.1                                     | 0.62                                            | (0, 1)                                     |
| 11         | 1                                         | 4                                              | 1.8                                     | 0.82                                            | 0                                          |
| 12         | 1                                         | 4                                              | 1.5                                     | 0.74                                            | 1                                          |
| 13         | 1                                         | 2                                              | 0.85                                    | 0.31                                            | 1                                          |
| 14         | 1                                         | 2                                              | 0.90                                    | 1.1                                             | 0                                          |
| 15         | 1                                         | 2                                              | 1.2                                     | 0.45                                            | 1                                          |
