# Supplementary material for: Defect patterns on the curved surface of fish retinae suggest a mechanism of cone mosaic formation
Source: PubMed Central journal article supplement (PMC7771878; doi:10.1371/journal.pcbi.1008437), 2020-12-15
Supplement: pcbi.1008437.s016.pdf [file pcbi.1008437.s016.pdf]

If we define a grain boundary (GB) as a region (at the retinal margin) at which the domain orientation rotates by 10 degrees or more at the time of photoconversion, the following table (and following p-value for significance of grain boundary growth) applies:

| Fish Label | # of Y-Junctions Added Between Photoconversion and Later Imaging | Mean Distance Between New Y-Junction and Nearest GB if Uncorrelated ( $\mu m$ ) | Median Distance Between New Y-Junction and Nearest GB if Uncorrelated ( $\mu m$ ) | Actual Distance Between new Y-Junctions and GB ( $\mu m$ ) |
|------------|------------------------------------------------------------------|---------------------------------------------------------------------------------|-----------------------------------------------------------------------------------|------------------------------------------------------------|
| 1          | 6                                                                | 84                                                                              | 73                                                                                | [9, 2, 15, 12, 12, 46]                                     |
| 2          | 2                                                                | 91                                                                              | 73                                                                                | [24, 4]                                                    |
| 3          | 3                                                                | 87                                                                              | 73                                                                                | [1, 2, 65]                                                 |
| 4          | 4                                                                | 45                                                                              | 44                                                                                | [24, 1, 5, 1]                                              |
| 5          | 1                                                                | 73                                                                              | 73                                                                                | 1                                                          |
| 6          | 2                                                                | 75                                                                              | 73                                                                                | [4, 1]                                                     |
| 7          | 3                                                                | 74                                                                              | 73                                                                                | [11, 123, 42]                                              |
| 9          | 2                                                                | 73                                                                              | 73                                                                                | [18, 20]                                                   |
| 10         | 2                                                                | 94                                                                              | 78                                                                                | [2, 2]                                                     |
| 11         | 8                                                                | 43                                                                              | 39                                                                                | [12, 23, 45, 1, 0, 95, 20, 69]                             |
| 12         | 4                                                                | 39                                                                              | 36                                                                                | [15, 5, 11, 36]                                            |

$p < 0.000001$

If we define a grain boundary (GB) as a region (at the retinal margin) at which the domain orientation rotates by 12 degrees or more at the time of photoconversion, the following table (and following p-value for significance of grain boundary growth) applies:

| Fish Label | # of Y-Junctions Added Between Photoconversion and Later Imaging | Mean Distance Between New Y-Junction and Nearest GB if Uncorrelated ( $\mu m$ ) | Median Distance Between New Y-Junction and Nearest GB if Uncorrelated ( $\mu m$ ) | Actual Distance Between new Y-Junctions and GB ( $\mu m$ ) |
|------------|------------------------------------------------------------------|---------------------------------------------------------------------------------|-----------------------------------------------------------------------------------|------------------------------------------------------------|
| 1          | 6                                                                | 84                                                                              | 73                                                                                | [9, 2, 15, 12, 12, 46]                                     |
| 2          | 2                                                                | 91                                                                              | 73                                                                                | [24, 4]                                                    |
| 3          | 3                                                                | 87                                                                              | 73                                                                                | [1, 2, 65]                                                 |
| 4          | 4                                                                | 45                                                                              | 44                                                                                | [24, 1, 5, 1]                                              |

|    |   |    |    |                                      |
|----|---|----|----|--------------------------------------|
| 6  | 2 | 75 | 73 | [4, 1]                               |
| 10 | 2 | 94 | 78 | [2, 2]                               |
| 11 | 8 | 99 | 88 | [12, 23, 158, 205, 203, 108, 20, 69] |
| 12 | 4 | 39 | 36 | [15, 5, 11, 36]                      |

$$p < 0.00006$$

If we define a grain boundary (GB) as a region (at the retinal margin) at which the domain orientation rotates by 14 degrees or more at the time of photoconversion, the following table (and following p-value for significance of grain boundary growth) applies:

| <b>Fish Label</b> | <b># of Y-Junctions Added Between Photoconversion and Later Imaging</b> | <b>Mean Distance Between New Y-Junction and Nearest GB if Uncorrelated (<math>\mu m</math>)</b> | <b>Median Distance Between New Y-Junction and Nearest GB if Uncorrelated (<math>\mu m</math>)</b> | <b>Actual Distance Between new Y-Junctions and GB (<math>\mu m</math>)</b> |
|-------------------|-------------------------------------------------------------------------|-------------------------------------------------------------------------------------------------|---------------------------------------------------------------------------------------------------|----------------------------------------------------------------------------|
| 1                 | 6                                                                       | 84                                                                                              | 73                                                                                                | [9, 2, 15, 12, 12, 46]                                                     |
| 2                 | 2                                                                       | 91                                                                                              | 73                                                                                                | [24, 4]                                                                    |
| 3                 | 3                                                                       | 87                                                                                              | 73                                                                                                | [1, 2, 65]                                                                 |
| 4                 | 4                                                                       | 45                                                                                              | 44                                                                                                | [24, 1, 5, 1]                                                              |
| 10                | 2                                                                       | 94                                                                                              | 78                                                                                                | [2, 2]                                                                     |
| 11                | 8                                                                       | 99                                                                                              | 88                                                                                                | [12, 23, 158, 205, 203, 108, 20, 69]                                       |
| 12                | 4                                                                       | 39                                                                                              | 36                                                                                                | [15, 5, 11, 36]                                                            |

$$p = 0.0003$$
