# Supplementary material for: Defect patterns on the curved surface of fish retinae suggest a mechanism of cone mosaic formation
Source: PubMed Central journal article supplement (PMC7771878; doi:10.1371/journal.pcbi.1008437), 2020-12-15
Supplement: pcbi.1008437.s017.pdf [file pcbi.1008437.s017.pdf]

For all simulations in the below table,  $R = -\frac{1}{4}$ ;  $\psi_0 = -\frac{\sqrt{-R}}{2}$

|                        |                       | Box Dimension<br>(in units of row width) |                     |                       |                       |                     |                       |                       |                     |                     |     |     |
|------------------------|-----------------------|------------------------------------------|---------------------|-----------------------|-----------------------|---------------------|-----------------------|-----------------------|---------------------|---------------------|-----|-----|
|                        |                       | $\approx 3$                              |                     |                       | $\approx 4$           |                     |                       | $\approx 5$           |                     |                     |     |     |
| Domain Rotation Cutoff | 10.0°                 | noise = $\frac{3}{4}$                    | # Y-Junctions       | # Y-Junctions in GB   | noise = $\frac{3}{4}$ | # Y-Junctions       | # Y-Junctions in GB   | noise = $\frac{3}{4}$ | # Y-Junctions       | # Y-Junctions in GB |     |     |
|                        |                       | 68817                                    | 213                 | 146                   | 68817                 | 213                 | 137                   | 68817                 | 213                 | 133                 |     |     |
|                        |                       | 153033                                   | 202                 | 121                   | 153033                | 202                 | 118                   | 153033                | 202                 | 109                 |     |     |
|                        |                       | 4526243                                  | 210                 | 122                   | 4526243               | 210                 | 115                   | 4526243               | 210                 | 115                 |     |     |
|                        |                       | 24927051                                 | 207                 | 130                   | 24927051              | 207                 | 120                   | 24927051              | 207                 | 112                 |     |     |
|                        |                       | Average % in GB                          |                     | 62%                   |                       | Average % in GB     |                       | 59%                   |                     | Average % in GB     |     | 56% |
|                        |                       | noise = 1                                | # Y-Junctions       | # Y-Junctions in GB   | noise = 1             | # Y-Junctions       | # Y-Junctions in GB   | noise = 1             | # Y-Junctions       | # Y-Junctions in GB |     |     |
|                        |                       | 56824                                    | 205                 | 119                   | 56824                 | 205                 | 121                   | 56824                 | 205                 | 120                 |     |     |
|                        |                       | 452849                                   | 205                 | 130                   | 452849                | 205                 | 122                   | 452849                | 205                 | 116                 |     |     |
|                        |                       | 7967093                                  | 203                 | 145                   | 7967093               | 203                 | 136                   | 7967093               | 203                 | 137                 |     |     |
|                        | 48068598              | 203                                      | 127                 | 48068598              | 203                   | 121                 | 48068598              | 203                   | 115                 |                     |     |     |
|                        | Average % in GB       |                                          | 64%                 |                       | Average % in GB       |                     | 61%                   |                       | Average % in GB     |                     | 60% |     |
|                        | noise = $\frac{5}{4}$ | # Y-Junctions                            | # Y-Junctions in GB | noise = $\frac{5}{4}$ | # Y-Junctions         | # Y-Junctions in GB | noise = $\frac{5}{4}$ | # Y-Junctions         | # Y-Junctions in GB |                     |     |     |
|                        | 990                   | 203                                      | 137                 | 990                   | 203                   | 139                 | 990                   | 203                   | 134                 |                     |     |     |
|                        | 14026                 | 206                                      | 145                 | 14026                 | 206                   | 141                 | 14026                 | 206                   | 131                 |                     |     |     |
|                        | 100657                | 198                                      | 129                 | 100657                | 198                   | 128                 | 100657                | 198                   | 125                 |                     |     |     |
|                        | 271575                | 205                                      | 156                 | 271575                | 205                   | 157                 | 271575                | 205                   | 162                 |                     |     |     |
|                        | Average % in GB       |                                          | 70%                 |                       | Average % in GB       |                     | 70%                   |                       | Average % in GB     |                     | 68% |     |
|                        | 12.0°                 | noise = $\frac{3}{4}$                    | # Y-Junctions       | # Y-Junctions in GB   | noise = $\frac{3}{4}$ | # Y-Junctions       | # Y-Junctions in GB   | noise = $\frac{3}{4}$ | # Y-Junctions       | # Y-Junctions in GB |     |     |
|                        |                       | 68817                                    | 213                 | 114                   | 68817                 | 213                 | 113                   | 68817                 | 213                 | 112                 |     |     |
| 153033                 |                       | 202                                      | 76                  | 153033                | 202                   | 82                  | 153033                | 202                   | 86                  |                     |     |     |
| 4526243                |                       | 210                                      | 88                  | 4526243               | 210                   | 85                  | 4526243               | 210                   | 89                  |                     |     |     |
| 24927051               |                       | 207                                      | 87                  | 24927051              | 207                   | 94                  | 24927051              | 207                   | 86                  |                     |     |     |
| Average % in GB        |                       | 44%                                      |                     | Average % in GB       |                       | 45%                 |                       | Average % in GB       |                     | 45%                 |     |     |
| noise = 1              |                       | # Y-Junctions                            | # Y-Junctions in GB | noise = 1             | # Y-Junctions         | # Y-Junctions in GB | noise = 1             | # Y-Junctions         | # Y-Junctions in GB |                     |     |     |

|                 |                       |               |                     |                       |               |                     |                       |               |                     |
|-----------------|-----------------------|---------------|---------------------|-----------------------|---------------|---------------------|-----------------------|---------------|---------------------|
|                 |                       |               | ns in GB            |                       |               | ns in GB            |                       |               | ns in GB            |
|                 | 56824                 | 205           | 89                  | 56824                 | 205           | 91                  | 56824                 | 205           | 86                  |
|                 | 452849                | 205           | 95                  | 452849                | 205           | 96                  | 452849                | 205           | 92                  |
|                 | 7967093               | 203           | 109                 | 7967093               | 203           | 111                 | 7967093               | 203           | 111                 |
|                 | 48068598              | 203           | 95                  | 48068598              | 203           | 90                  | 48068598              | 203           | 95                  |
|                 | Average % in GB       |               | 48%                 | Average % in GB       |               | 48%                 | Average % in GB       |               | 47%                 |
|                 | noise = $\frac{5}{4}$ | # Y-Junctions | # Y-Junctions in GB | noise = $\frac{5}{4}$ | # Y-Junctions | # Y-Junctions in GB | noise = $\frac{5}{4}$ | # Y-Junctions | # Y-Junctions in GB |
|                 | 990                   | 203           | 112                 | 990                   | 203           | 118                 | 990                   | 203           | 119                 |
|                 | 14026                 | 206           | 106                 | 14026                 | 206           | 104                 | 14026                 | 206           | 98                  |
|                 | 100657                | 198           | 96                  | 100657                | 198           | 104                 | 100657                | 198           | 104                 |
|                 | 271575                | 205           | 129                 | 271575                | 205           | 134                 | 271575                | 205           | 131                 |
|                 | Average % in GB       |               | 55%                 | Average % in GB       |               | 57%                 | Average % in GB       |               | 56%                 |
| 14.0°           | noise = $\frac{3}{4}$ | # Y-Junctions | # Y-Junctions in GB | noise = $\frac{3}{4}$ | # Y-Junctions | # Y-Junctions in GB | noise = $\frac{3}{4}$ | # Y-Junctions | # Y-Junctions in GB |
|                 | 68817                 | 213           | 81                  | 68817                 | 213           | 89                  | 68817                 | 213           | 88                  |
|                 | 153033                | 202           | 51                  | 153033                | 202           | 58                  | 153033                | 202           | 66                  |
|                 | 4526243               | 210           | 68                  | 4526243               | 210           | 68                  | 4526243               | 210           | 62                  |
|                 | 24927051              | 207           | 65                  | 24927051              | 207           | 71                  | 24927051              | 207           | 67                  |
|                 | Average % in GB       |               | 32%                 | Average % in GB       |               | 34%                 | Average % in GB       |               | 34%                 |
|                 | noise = 1             | # Y-Junctions | # Y-Junctions in GB | noise = 1             | # Y-Junctions | # Y-Junctions in GB | noise = 1             | # Y-Junctions | # Y-Junctions in GB |
|                 | 56824                 | 205           | 65                  | 56824                 | 205           | 66                  | 56824                 | 205           | 57                  |
|                 | 452849                | 205           | 68                  | 452849                | 205           | 70                  | 452849                | 205           | 65                  |
|                 | 7967093               | 203           | 83                  | 7967093               | 203           | 87                  | 7967093               | 203           | 82                  |
|                 | 48068598              | 203           | 67                  | 48068598              | 203           | 67                  | 48068598              | 203           | 69                  |
|                 | Average % in GB       |               | 35%                 | Average % in GB       |               | 36%                 | Average % in GB       |               | 33%                 |
|                 | noise = $\frac{5}{4}$ | # Y-Junctions | # Y-Junctions in GB | noise = $\frac{5}{4}$ | # Y-Junctions | # Y-Junctions in GB | noise = $\frac{5}{4}$ | # Y-Junctions | # Y-Junctions in GB |
|                 | 990                   | 203           | 88                  | 990                   | 203           | 90                  | 990                   | 203           | 93                  |
|                 | 14026                 | 206           | 74                  | 14026                 | 206           | 77                  | 14026                 | 206           | 65                  |
| 100657          | 198                   | 80            | 100657              | 198                   | 82            | 100657              | 198                   | 81            |                     |
| 271575          | 205                   | 91            | 271575              | 205                   | 94            | 271575              | 205                   | 90            |                     |
| Average % in GB |                       | 41%           | Average % in GB     |                       | 42%           | Average % in GB     |                       | 41%           |                     |

For all simulations in the below table,  $R = -\frac{1}{2}$ ;  $\psi_0 = -\frac{\sqrt{-R}}{2}$

|                        |                       | Box Dimension<br>(in units of row width) |                     |                       |                       |                     |                       |                       |                     |                     |     |     |
|------------------------|-----------------------|------------------------------------------|---------------------|-----------------------|-----------------------|---------------------|-----------------------|-----------------------|---------------------|---------------------|-----|-----|
|                        |                       | $\approx 3$                              |                     |                       | $\approx 4$           |                     |                       | $\approx 5$           |                     |                     |     |     |
| Domain Rotation Cutoff | 10.0°                 | noise = $\frac{3}{4}$                    | # Y-Junctions       | # Y-Junctions in GB   | noise = $\frac{3}{4}$ | # Y-Junctions       | # Y-Junctions in GB   | noise = $\frac{3}{4}$ | # Y-Junctions       | # Y-Junctions in GB |     |     |
|                        |                       | 582                                      | 225                 | 136                   | 582                   | 225                 | 136                   | 582                   | 225                 | 126                 |     |     |
|                        |                       | 70355                                    | 220                 | 140                   | 70355                 | 220                 | 146                   | 70355                 | 220                 | 141                 |     |     |
|                        |                       | 136537                                   | 229                 | 147                   | 136537                | 229                 | 139                   | 136537                | 229                 | 136                 |     |     |
|                        |                       | 9052576                                  | 228                 | 150                   | 9052576               | 228                 | 143                   | 9052576               | 228                 | 130                 |     |     |
|                        |                       | Average % in GB                          |                     | 64%                   |                       | Average % in GB     |                       | 63%                   |                     | Average % in GB     |     | 59% |
|                        |                       | noise = 1                                | # Y-Junctions       | # Y-Junctions in GB   | noise = 1             | # Y-Junctions       | # Y-Junctions in GB   | noise = 1             | # Y-Junctions       | # Y-Junctions in GB |     |     |
|                        |                       | 35260                                    | 221                 | 138                   | 35260                 | 221                 | 126                   | 35260                 | 221                 | 129                 |     |     |
|                        |                       | 161783                                   | 208                 | 123                   | 161783                | 208                 | 116                   | 161783                | 208                 | 109                 |     |     |
|                        |                       | 594379                                   | 219                 | 133                   | 594379                | 219                 | 124                   | 594379                | 219                 | 130                 |     |     |
|                        | 4864909               | 219                                      | 143                 | 4864909               | 219                   | 131                 | 4864909               | 219                   | 121                 |                     |     |     |
|                        | Average % in GB       |                                          | 62%                 |                       | Average % in GB       |                     | 57%                   |                       | Average % in GB     |                     | 56% |     |
|                        | noise = $\frac{5}{4}$ | # Y-Junctions                            | # Y-Junctions in GB | noise = $\frac{5}{4}$ | # Y-Junctions         | # Y-Junctions in GB | noise = $\frac{5}{4}$ | # Y-Junctions         | # Y-Junctions in GB |                     |     |     |
|                        | 1079                  | 210                                      | 141                 | 1079                  | 210                   | 147                 | 1079                  | 210                   | 144                 |                     |     |     |
|                        | 110372                | 217                                      | 116                 | 110372                | 217                   | 105                 | 110372                | 217                   | 100                 |                     |     |     |
|                        | 293012                | 204                                      | 122                 | 293012                | 204                   | 110                 | 293012                | 204                   | 108                 |                     |     |     |
|                        | 600365                | 211                                      | 126                 | 600365                | 211                   | 126                 | 600365                | 211                   | 125                 |                     |     |     |
|                        | Average % in GB       |                                          | 60%                 |                       | Average % in GB       |                     | 58%                   |                       | Average % in GB     |                     | 57% |     |
|                        | 12.0°                 | noise = $\frac{3}{4}$                    | # Y-Junctions       | # Y-Junctions in GB   | noise = $\frac{3}{4}$ | # Y-Junctions       | # Y-Junctions in GB   | noise = $\frac{3}{4}$ | # Y-Junctions       | # Y-Junctions in GB |     |     |
|                        |                       | 582                                      | 225                 | 100                   | 582                   | 225                 | 89                    | 582                   | 225                 | 98                  |     |     |
| 70355                  |                       | 220                                      | 121                 | 70355                 | 220                   | 118                 | 70355                 | 220                   | 110                 |                     |     |     |
| 136537                 |                       | 229                                      | 103                 | 136537                | 229                   | 106                 | 136537                | 229                   | 99                  |                     |     |     |
| 9052576                |                       | 228                                      | 105                 | 9052576               | 228                   | 105                 | 9052576               | 228                   | 97                  |                     |     |     |
| Average % in GB        |                       | 48%                                      |                     | Average % in GB       |                       | 46%                 |                       | Average % in GB       |                     | 45%                 |     |     |
| noise = 1              | # Y-Junctions         | # Y-Junctions in GB                      | noise = 1           | # Y-Junctions         | # Y-Junctions in GB   | noise = 1           | # Y-Junctions         | # Y-Junctions in GB   |                     |                     |     |     |

|                 |                       |                   |                            |                       |                   |                            |                       |                   |                            |
|-----------------|-----------------------|-------------------|----------------------------|-----------------------|-------------------|----------------------------|-----------------------|-------------------|----------------------------|
|                 | 35260                 | 221               | 109                        | 35260                 | 221               | 105                        | 35260                 | 221               | 108                        |
|                 | 161783                | 208               | 93                         | 161783                | 208               | 92                         | 161783                | 208               | 87                         |
|                 | 594379                | 219               | 97                         | 594379                | 219               | 96                         | 594379                | 219               | 86                         |
|                 | 4864909               | 219               | 98                         | 4864909               | 219               | 96                         | 4864909               | 219               | 90                         |
|                 | Average % in GB       |                   | 46%                        | Average % in GB       |                   | 45%                        | Average % in GB       |                   | 43%                        |
|                 | noise = $\frac{5}{4}$ | # Y-Juncti<br>ons | # Y-Junctio<br>ns in<br>GB | noise = $\frac{5}{4}$ | # Y-Juncti<br>ons | # Y-Junctio<br>ns in<br>GB | noise = $\frac{5}{4}$ | # Y-Juncti<br>ons | # Y-Junctio<br>ns in<br>GB |
|                 | 1079                  | 210               | 117                        | 1079                  | 210               | 121                        | 1079                  | 210               | 117                        |
|                 | 110372                | 217               | 74                         | 110372                | 217               | 78                         | 110372                | 217               | 73                         |
|                 | 293012                | 204               | 82                         | 293012                | 204               | 74                         | 293012                | 204               | 74                         |
|                 | 600365                | 211               | 88                         | 600365                | 211               | 96                         | 600365                | 211               | 86                         |
|                 | Average % in GB       |                   | 43%                        | Average % in GB       |                   | 44%                        | Average % in GB       |                   | 42%                        |
| 14.0°           | noise = $\frac{3}{4}$ | # Y-Juncti<br>ons | # Y-Junctio<br>ns in<br>GB | noise = $\frac{3}{4}$ | # Y-Juncti<br>ons | # Y-Junctio<br>ns in<br>GB | noise = $\frac{3}{4}$ | # Y-Juncti<br>ons | # Y-Junctio<br>ns in<br>GB |
|                 | 582                   | 225               | 71                         | 582                   | 225               | 68                         | 582                   | 225               | 67                         |
|                 | 70355                 | 220               | 98                         | 70355                 | 220               | 97                         | 70355                 | 220               | 90                         |
|                 | 136537                | 229               | 81                         | 136537                | 229               | 78                         | 136537                | 229               | 73                         |
|                 | 9052576               | 228               | 77                         | 9052576               | 228               | 74                         | 9052576               | 228               | 71                         |
|                 | Average % in GB       |                   | 36%                        | Average % in GB       |                   | 35%                        | Average % in GB       |                   | 33%                        |
|                 | noise = 1             | # Y-Juncti<br>ons | # Y-Junctio<br>ns in<br>GB | noise = 1             | # Y-Juncti<br>ons | # Y-Junctio<br>ns in<br>GB | noise = 1             | # Y-Juncti<br>ons | # Y-Junctio<br>ns in<br>GB |
|                 | 35260                 | 221               | 87                         | 35260                 | 221               | 87                         | 35260                 | 221               | 88                         |
|                 | 161783                | 208               | 69                         | 161783                | 208               | 66                         | 161783                | 208               | 68                         |
|                 | 594379                | 219               | 67                         | 594379                | 219               | 59                         | 594379                | 219               | 56                         |
|                 | 4864909               | 219               | 79                         | 4864909               | 219               | 71                         | 4864909               | 219               | 64                         |
|                 | Average % in GB       |                   | 35%                        | Average % in GB       |                   | 33%                        | Average % in GB       |                   | 32%                        |
|                 | noise = $\frac{5}{4}$ | # Y-Juncti<br>ons | # Y-Junctio<br>ns in<br>GB | noise = $\frac{5}{4}$ | # Y-Juncti<br>ons | # Y-Junctio<br>ns in<br>GB | noise = $\frac{5}{4}$ | # Y-Juncti<br>ons | # Y-Junctio<br>ns in<br>GB |
|                 | 1079                  | 210               | 98                         | 1079                  | 210               | 97                         | 1079                  | 210               | 92                         |
|                 | 110372                | 217               | 43                         | 110372                | 217               | 44                         | 110372                | 217               | 38                         |
| 293012          | 204                   | 53                | 293012                     | 204                   | 56                | 293012                     | 204                   | 54                |                            |
| 600365          | 211                   | 68                | 600365                     | 211                   | 66                | 600365                     | 211                   | 61                |                            |
| Average % in GB |                       | 31%               | Average % in GB            |                       | 31%               | Average % in GB            |                       | 29%               |                            |

For all simulations in the below table,  $R = -\frac{2}{5}$ ;  $\psi_0 = -\frac{\sqrt{-R}}{2}$

|                        |                       | Box Dimension<br>(in units of row width) |                     |                       |                       |                     |                       |                       |                     |                     |     |     |
|------------------------|-----------------------|------------------------------------------|---------------------|-----------------------|-----------------------|---------------------|-----------------------|-----------------------|---------------------|---------------------|-----|-----|
|                        |                       | ≈3                                       |                     |                       | ≈4                    |                     |                       | ≈5                    |                     |                     |     |     |
| Domain Rotation Cutoff | 10.0°                 | noise = $\frac{3}{4}$                    | # Y-Junctions       | # Y-Junctions in GB   | noise = $\frac{3}{4}$ | # Y-Junctions       | # Y-Junctions in GB   | noise = $\frac{3}{4}$ | # Y-Junctions       | # Y-Junctions in GB |     |     |
|                        |                       | 906                                      | 209                 | 127                   | 906                   | 209                 | 118                   | 906                   | 209                 | 110                 |     |     |
|                        |                       | 4047                                     | 224                 | 138                   | 4047                  | 224                 | 124                   | 4047                  | 224                 | 127                 |     |     |
|                        |                       | 90525                                    | 219                 | 131                   | 90525                 | 219                 | 118                   | 90525                 | 219                 | 121                 |     |     |
|                        |                       | 882232                                   | 222                 | 118                   | 882232                | 222                 | 116                   | 882232                | 222                 | 111                 |     |     |
|                        |                       | Average % in GB                          |                     | 59%                   |                       | Average % in GB     |                       | 55%                   |                     | Average % in GB     |     | 54% |
|                        |                       | noise = 1                                | # Y-Junctions       | # Y-Junctions in GB   | noise = 1             | # Y-Junctions       | # Y-Junctions in GB   | noise = 1             | # Y-Junctions       | # Y-Junctions in GB |     |     |
|                        |                       | 5062                                     | 209                 | 138                   | 5062                  | 209                 | 127                   | 5062                  | 209                 | 122                 |     |     |
|                        |                       | 29490                                    | 216                 | 142                   | 29490                 | 216                 | 126                   | 29490                 | 216                 | 121                 |     |     |
|                        |                       | 65719                                    | 219                 | 157                   | 65719                 | 219                 | 139                   | 65719                 | 219                 | 142                 |     |     |
|                        | 1275730               | 211                                      | 149                 | 1275730               | 211                   | 149                 | 1275730               | 211                   | 141                 |                     |     |     |
|                        | Average % in GB       |                                          | 69%                 |                       | Average % in GB       |                     | 63%                   |                       | Average % in GB     |                     | 62% |     |
|                        | noise = $\frac{5}{4}$ | # Y-Junctions                            | # Y-Junctions in GB | noise = $\frac{5}{4}$ | # Y-Junctions         | # Y-Junctions in GB | noise = $\frac{5}{4}$ | # Y-Junctions         | # Y-Junctions in GB |                     |     |     |
|                        | 55142                 | 208                                      | 130                 | 55142                 | 208                   | 124                 | 55142                 | 208                   | 123                 |                     |     |     |
|                        | 151274                | 215                                      | 135                 | 151274                | 215                   | 139                 | 151274                | 215                   | 125                 |                     |     |     |
|                        | 569271                | 212                                      | 121                 | 569271                | 212                   | 125                 | 569271                | 212                   | 110                 |                     |     |     |
|                        | 1006568               | 207                                      | 116                 | 1006568               | 207                   | 107                 | 1006568               | 207                   | 98                  |                     |     |     |
|                        | Average % in GB       |                                          | 60%                 |                       | Average % in GB       |                     | 59%                   |                       | Average % in GB     |                     | 54% |     |
|                        | 12.0°                 | noise = $\frac{3}{4}$                    | # Y-Junctions       | # Y-Junctions in GB   | noise = $\frac{3}{4}$ | # Y-Junctions       | # Y-Junctions in GB   | noise = $\frac{3}{4}$ | # Y-Junctions       | # Y-Junctions in GB |     |     |
|                        |                       | 906                                      | 209                 | 82                    | 906                   | 209                 | 80                    | 906                   | 209                 | 81                  |     |     |
| 4047                   |                       | 224                                      | 102                 | 4047                  | 224                   | 98                  | 4047                  | 224                   | 91                  |                     |     |     |
| 90525                  |                       | 219                                      | 96                  | 90525                 | 219                   | 95                  | 90525                 | 219                   | 96                  |                     |     |     |
| 882232                 |                       | 222                                      | 78                  | 882232                | 222                   | 85                  | 882232                | 222                   | 83                  |                     |     |     |
| Average % in GB        |                       | 41%                                      |                     | Average % in GB       |                       | 41%                 |                       | Average % in GB       |                     | 40%                 |     |     |
| noise = 1              |                       | # Y-Junctions                            | # Y-Junctions in GB | noise = 1             | # Y-Junctions         | # Y-Junctions in GB | noise = 1             | # Y-Junctions         | # Y-Junctions in GB |                     |     |     |

|                       |                       |                                |                                |                       |                                |                                |                       |                                |                                |
|-----------------------|-----------------------|--------------------------------|--------------------------------|-----------------------|--------------------------------|--------------------------------|-----------------------|--------------------------------|--------------------------------|
|                       | 5062                  | 209                            | 90                             | 5062                  | 209                            | 95                             | 5062                  | 209                            | 97                             |
|                       | 29490                 | 216                            | 97                             | 29490                 | 216                            | 93                             | 29490                 | 216                            | 90                             |
|                       | 65719                 | 219                            | 114                            | 65719                 | 219                            | 120                            | 65719                 | 219                            | 114                            |
|                       | 1275730               | 211                            | 121                            | 1275730               | 211                            | 126                            | 1275730               | 211                            | 116                            |
|                       | Average % in GB       |                                | 49%                            | Average % in GB       |                                | 51%                            | Average % in GB       |                                | 49%                            |
|                       | noise = $\frac{5}{4}$ | # Y-Juncti<br>ons              | # Y-<br>Junctio<br>ns in<br>GB | noise = $\frac{5}{4}$ | # Y-<br>Juncti<br>ons          | # Y-<br>Junctio<br>ns in<br>GB | noise = $\frac{5}{4}$ | # Y-<br>Juncti<br>ons          | # Y-<br>Junctio<br>ns in<br>GB |
|                       | 55142                 | 208                            | 97                             | 55142                 | 208                            | 97                             | 55142                 | 208                            | 90                             |
|                       | 151274                | 215                            | 94                             | 151274                | 215                            | 100                            | 151274                | 215                            | 92                             |
|                       | 569271                | 212                            | 86                             | 569271                | 212                            | 78                             | 569271                | 212                            | 74                             |
|                       | 1006568               | 207                            | 57                             | 1006568               | 207                            | 56                             | 1006568               | 207                            | 59                             |
| Average % in GB       |                       | 40%                            | Average % in GB                |                       | 39%                            | Average % in GB                |                       | 37%                            |                                |
| 14.0°                 | noise = $\frac{3}{4}$ | # Y-<br>Juncti<br>ons          | # Y-<br>Junctio<br>ns in<br>GB | noise = $\frac{3}{4}$ | # Y-<br>Juncti<br>ons          | # Y-<br>Junctio<br>ns in<br>GB | noise = $\frac{3}{4}$ | # Y-<br>Juncti<br>ons          | # Y-<br>Junctio<br>ns in<br>GB |
|                       | 906                   | 209                            | 56                             | 906                   | 209                            | 52                             | 906                   | 209                            | 48                             |
|                       | 4047                  | 224                            | 85                             | 4047                  | 224                            | 74                             | 4047                  | 224                            | 69                             |
|                       | 90525                 | 219                            | 79                             | 90525                 | 219                            | 85                             | 90525                 | 219                            | 86                             |
|                       | 882232                | 222                            | 64                             | 882232                | 222                            | 59                             | 882232                | 222                            | 57                             |
|                       | Average % in GB       |                                | 32%                            | Average % in GB       |                                | 31%                            | Average % in GB       |                                | 30%                            |
|                       | noise = 1             | # Y-<br>Juncti<br>ons          | # Y-<br>Junctio<br>ns in<br>GB | noise = 1             | # Y-<br>Juncti<br>ons          | # Y-<br>Junctio<br>ns in<br>GB | noise = 1             | # Y-<br>Juncti<br>ons          | # Y-<br>Junctio<br>ns in<br>GB |
|                       | 5062                  | 209                            | 66                             | 5062                  | 209                            | 67                             | 5062                  | 209                            | 65                             |
|                       | 29490                 | 216                            | 66                             | 29490                 | 216                            | 64                             | 29490                 | 216                            | 65                             |
|                       | 65719                 | 219                            | 94                             | 65719                 | 219                            | 97                             | 65719                 | 219                            | 89                             |
| 1275730               | 211                   | 97                             | 1275730                        | 211                   | 101                            | 1275730                        | 211                   | 98                             |                                |
| Average % in GB       |                       | 38%                            | Average % in GB                |                       | 38%                            | Average % in GB                |                       | 37%                            |                                |
| noise = $\frac{5}{4}$ | # Y-<br>Juncti<br>ons | # Y-<br>Junctio<br>ns in<br>GB | noise = $\frac{5}{4}$          | # Y-<br>Juncti<br>ons | # Y-<br>Junctio<br>ns in<br>GB | noise = $\frac{5}{4}$          | # Y-<br>Juncti<br>ons | # Y-<br>Junctio<br>ns in<br>GB |                                |
| 55142                 | 208                   | 63                             | 55142                          | 208                   | 65                             | 55142                          | 208                   | 54                             |                                |
| 151274                | 215                   | 65                             | 151274                         | 215                   | 65                             | 151274                         | 215                   | 63                             |                                |
| 569271                | 212                   | 60                             | 569271                         | 212                   | 50                             | 569271                         | 212                   | 49                             |                                |
| 1006568               | 207                   | 33                             | 1006568                        | 207                   | 32                             | 1006568                        | 207                   | 35                             |                                |
| Average % in GB       |                       | 26%                            | Average % in GB                |                       | 25%                            | Average % in GB                |                       | 24%                            |                                |

For all simulations in the below table,  $R = -\frac{1}{10}$ ;  $\psi_0 = -\frac{\sqrt{-R}}{2}$

|                        |                       | Box Dimension<br>(in units of row width) |                     |                       |                       |                     |                       |                       |                     |                     |
|------------------------|-----------------------|------------------------------------------|---------------------|-----------------------|-----------------------|---------------------|-----------------------|-----------------------|---------------------|---------------------|
|                        |                       | $\approx 3$                              |                     |                       | $\approx 4$           |                     |                       | $\approx 5$           |                     |                     |
| Domain Rotation Cutoff | 10.0°                 | noise = $\frac{3}{4}$                    | # Y-Junctions       | # Y-Junctions in GB   | noise = $\frac{3}{4}$ | # Y-Junctions       | # Y-Junctions in GB   | noise = $\frac{3}{4}$ | # Y-Junctions       | # Y-Junctions in GB |
|                        |                       | 41329                                    | 206                 | 176                   | 41329                 | 206                 | 172                   | 41329                 | 206                 | 172                 |
|                        |                       | 260407                                   | 211                 | 160                   | 260407                | 211                 | 157                   | 260407                | 211                 | 154                 |
|                        |                       | 797443                                   | 225                 | 171                   | 797443                | 225                 | 178                   | 797443                | 225                 | 177                 |
|                        |                       | 56228384                                 | 218                 | 162                   | 56228384              | 218                 | 161                   | 56228384              | 218                 | 160                 |
|                        |                       | Average % in GB                          |                     | 78%                   | Average % in GB       |                     | 78%                   | Average % in GB       |                     | 77%                 |
|                        |                       | noise = 1                                | # Y-Junctions       | # Y-Junctions in GB   | noise = 1             | # Y-Junctions       | # Y-Junctions in GB   | noise = 1             | # Y-Junctions       | # Y-Junctions in GB |
|                        |                       | 87316                                    | 210                 | 175                   | 87316                 | 210                 | 158                   | 87316                 | 210                 | 162                 |
|                        |                       | 316054                                   | 206                 | 171                   | 316054                | 206                 | 164                   | 316054                | 206                 | 149                 |
|                        |                       | 3557464                                  | 205                 | 173                   | 3557464               | 205                 | 170                   | 3557464               | 205                 | 167                 |
|                        | 5098315               | 219                                      | 167                 | 5098315               | 219                   | 159                 | 5098315               | 219                   | 154                 |                     |
|                        | Average % in GB       |                                          | 82%                 | Average % in GB       |                       | 78%                 | Average % in GB       |                       | 75%                 |                     |
|                        | noise = $\frac{5}{4}$ | # Y-Junctions                            | # Y-Junctions in GB | noise = $\frac{5}{4}$ | # Y-Junctions         | # Y-Junctions in GB | noise = $\frac{5}{4}$ | # Y-Junctions         | # Y-Junctions in GB |                     |
|                        | 1106                  | 227                                      | 191                 | 1106                  | 227                   | 196                 | 1106                  | 227                   | 193                 |                     |
|                        | 118899                | 199                                      | 166                 | 118899                | 199                   | 170                 | 118899                | 199                   | 170                 |                     |
|                        | 292476                | 197                                      | 157                 | 292476                | 197                   | 155                 | 292476                | 197                   | 154                 |                     |
|                        | 1107199               | 198                                      | 159                 | 1107199               | 198                   | 155                 | 1107199               | 198                   | 158                 |                     |
|                        | Average % in GB       |                                          | 82%                 | Average % in GB       |                       | 82%                 | Average % in GB       |                       | 82%                 |                     |
|                        | 12.0°                 | noise = $\frac{3}{4}$                    | # Y-Junctions       | # Y-Junctions in GB   | noise = $\frac{3}{4}$ | # Y-Junctions       | # Y-Junctions in GB   | noise = $\frac{3}{4}$ | # Y-Junctions       | # Y-Junctions in GB |
|                        |                       | 41329                                    | 206                 | 159                   | 41329                 | 206                 | 156                   | 41329                 | 206                 | 153                 |
| 260407                 |                       | 211                                      | 137                 | 260407                | 211                   | 136                 | 260407                | 211                   | 138                 |                     |
| 797443                 |                       | 225                                      | 154                 | 797443                | 225                   | 163                 | 797443                | 225                   | 158                 |                     |
| 56228384               |                       | 218                                      | 124                 | 56228384              | 218                   | 129                 | 56228384              | 218                   | 131                 |                     |
| Average % in GB        |                       | 67%                                      | Average % in GB     |                       | 68%                   | Average % in GB     |                       | 67%                   |                     |                     |
| noise = 1              | # Y-Junctions         | # Y-Junctions in GB                      | noise = 1           | # Y-Junctions         | # Y-Junctions in GB   | noise = 1           | # Y-Junctions         | # Y-Junctions in GB   |                     |                     |

|                 |                       |               |                     |                       |               |                     |                       |               |                     |
|-----------------|-----------------------|---------------|---------------------|-----------------------|---------------|---------------------|-----------------------|---------------|---------------------|
|                 | 87316                 | 210           | 122                 | 87316                 | 210           | 127                 | 87316                 | 210           | 130                 |
|                 | 316054                | 206           | 139                 | 316054                | 206           | 130                 | 316054                | 206           | 130                 |
|                 | 3557464               | 205           | 154                 | 3557464               | 205           | 150                 | 3557464               | 205           | 149                 |
|                 | 5098315               | 219           | 128                 | 5098315               | 219           | 125                 | 5098315               | 219           | 124                 |
|                 | Average % in GB       |               | 65%                 | Average % in GB       |               | 63%                 | Average % in GB       |               | 63%                 |
|                 | noise = $\frac{5}{4}$ | # Y-Junctions | # Y-Junctions in GB | noise = $\frac{5}{4}$ | # Y-Junctions | # Y-Junctions in GB | noise = $\frac{5}{4}$ | # Y-Junctions | # Y-Junctions in GB |
|                 | 1106                  | 227           | 172                 | 1106                  | 227           | 174                 | 1106                  | 227           | 164                 |
|                 | 118899                | 199           | 140                 | 118899                | 199           | 149                 | 118899                | 199           | 149                 |
|                 | 292476                | 197           | 118                 | 292476                | 197           | 127                 | 292476                | 197           | 118                 |
|                 | 1107199               | 198           | 133                 | 1107199               | 198           | 135                 | 1107199               | 198           | 136                 |
|                 | Average % in GB       |               | 69%                 | Average % in GB       |               | 71%                 | Average % in GB       |               | 69%                 |
| 14.0°           | noise = $\frac{3}{4}$ | # Y-Junctions | # Y-Junctions in GB | noise = $\frac{3}{4}$ | # Y-Junctions | # Y-Junctions in GB | noise = $\frac{3}{4}$ | # Y-Junctions | # Y-Junctions in GB |
|                 | 41329                 | 206           | 121                 | 41329                 | 206           | 121                 | 41329                 | 206           | 120                 |
|                 | 260407                | 211           | 105                 | 260407                | 206           | 114                 | 260407                | 206           | 116                 |
|                 | 797443                | 225           | 133                 | 797443                | 225           | 125                 | 797443                | 225           | 124                 |
|                 | 56228384              | 218           | 107                 | 56228384              | 218           | 111                 | 56228384              | 218           | 109                 |
|                 | Average % in GB       |               | 54%                 | Average % in GB       |               | 55%                 | Average % in GB       |               | 55%                 |
|                 | noise = 1             | # Y-Junctions | # Y-Junctions in GB | noise = 1             | # Y-Junctions | # Y-Junctions in GB | noise = 1             | # Y-Junctions | # Y-Junctions in GB |
|                 | 87316                 | 210           | 95                  | 87316                 | 210           | 101                 | 87316                 | 210           | 98                  |
|                 | 316054                | 206           | 104                 | 316054                | 206           | 97                  | 316054                | 206           | 88                  |
|                 | 3557464               | 205           | 120                 | 3557464               | 205           | 121                 | 3557464               | 205           | 119                 |
|                 | 5098315               | 219           | 98                  | 5098315               | 219           | 97                  | 5098315               | 219           | 92                  |
|                 | Average % in GB       |               | 50%                 | Average % in GB       |               | 50%                 | Average % in GB       |               | 47%                 |
|                 | noise = $\frac{5}{4}$ | # Y-Junctions | # Y-Junctions in GB | noise = $\frac{5}{4}$ | # Y-Junctions | # Y-Junctions in GB | noise = $\frac{5}{4}$ | # Y-Junctions | # Y-Junctions in GB |
|                 | 1106                  | 227           | 135                 | 1106                  | 227           | 133                 | 1106                  | 227           | 123                 |
| 118899          | 199                   | 114           | 118899              | 199                   | 117           | 118899              | 199                   | 121           |                     |
| 292476          | 197                   | 85            | 292476              | 197                   | 87            | 292476              | 197                   | 90            |                     |
| 1107199         | 198                   | 106           | 1107199             | 198                   | 116           | 1107199             | 198                   | 119           |                     |
| Average % in GB |                       | 54%           | Average % in GB     |                       | 55%           | Average % in GB     |                       | 55%           |                     |
