# Supplementary material for: Defect patterns on the curved surface of fish retinae suggest a mechanism of cone mosaic formation
Source: PubMed Central journal article supplement (PMC7771878; doi:10.1371/journal.pcbi.1008437), 2020-12-15
Supplement: pcbi.1008437.s018.pdf [file pcbi.1008437.s018.pdf]

| <b>Fish #</b> | <b>Retinal Area<br/>(10<sup>6</sup> μm<sup>2</sup>)</b> | <b>% Area Analyzed</b> | <b>Y-Junction Count</b> | <b>% of Y-Junctions in GB</b> |
|---------------|---------------------------------------------------------|------------------------|-------------------------|-------------------------------|
| 1             | 2.4                                                     | 47                     | 155                     | 54                            |
| 2             | 2.1                                                     | 46                     | 166                     | 42                            |
| 3             | 3.9                                                     | 57                     | 221                     | 48                            |
| 4             | 3.8                                                     | 70                     | 275                     | 48                            |
| 5             | 5.3                                                     | 66                     | 249                     | 55                            |
| 6             | 4.2                                                     | 61                     | 184                     | 36                            |
| 7             | 5.4                                                     | 51                     | 182                     | 42                            |
| 8             | 5.4                                                     | 63                     | 285                     | 51                            |
